# Supplementary material for: Synergistic Protection of N-Acetylcysteine and Ascorbic Acid 2-Phosphate on Human Mesenchymal Stem cells Against Mitoptosis, Necroptosis and Apoptosis
Source: PubMed Central journal article supplement (PMC4408980; doi:10.1038/srep09819), 2015-04-24
Supplement: srep09819-s1.pdf [file srep09819-s1.pdf]

1 **Supplementary information**

2

3 **Synergistic Protection of N-Acetylcysteine and Ascorbic Acid 2-Phosphate on Human**

4 **Mesenchymal Stem cells Against Mitoptosis, Necroptosis and Apoptosis**

5 Chia-Jung Li<sup>1</sup>, Li-Yi Sun<sup>2</sup>, Cheng-Yoong Pang<sup>1,2\*</sup>

6 <sup>1</sup>Institute of Medical Sciences, Tzu Chi University, Hualien, Taiwan

7 <sup>2</sup>Department of Medical Research, Buddhist Tzu Chi General Hospital, Hualien, Taiwan

8

9

10

11

1 **Supplementary Fig. S1**

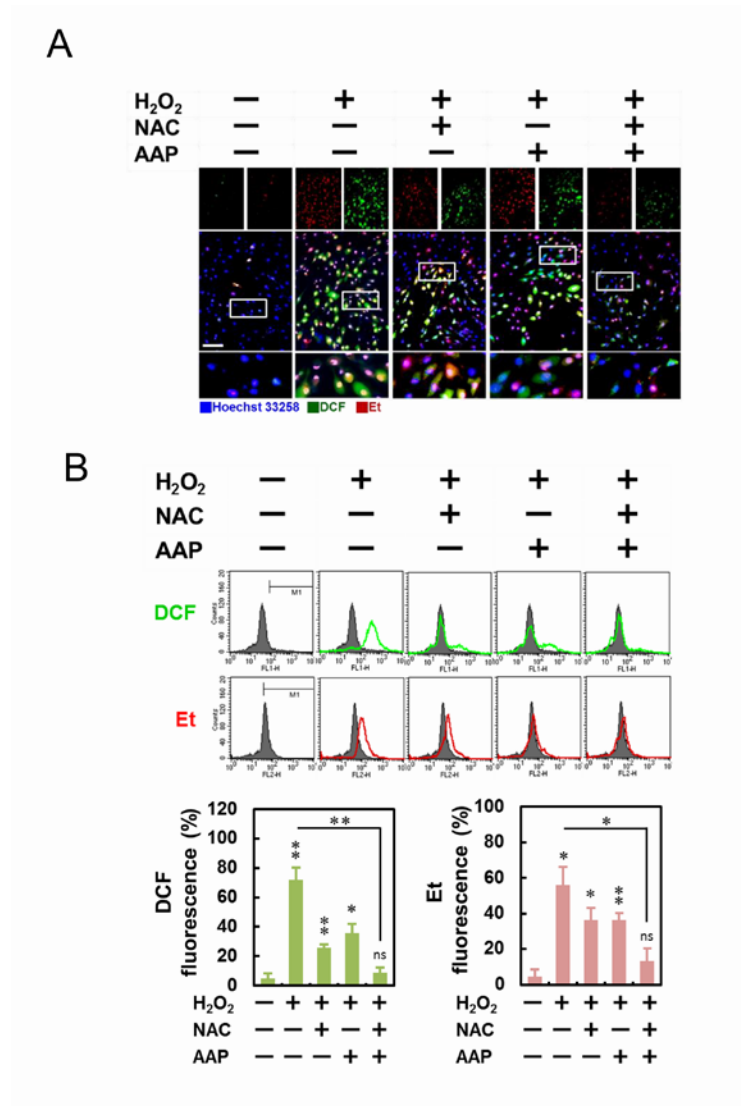

2

3 **Supplementary Fig. S1 NAC/AAP suppressed the generation of intracellular ROS in**  
 4 **H<sub>2</sub>O<sub>2</sub>-treated hADMSCs**

5 (A) hADMSCs were pre-treated with NAC and/or AAP followed by H<sub>2</sub>O<sub>2</sub> challenge. After various  
 6 treatments, the cells were stained with DCFDA (green) or DHE (red), respectively, and  
 7 counterstained with Hoechst 33258 (blue); the level of ROS was detected by fluorescence  
 8 microscope. Scale bar = 100 μm. (B) Flow cytometric analysis of the ROS in various groups of  
 9 NAC- and/or AAP-treated hADMSCs. Quantitative data were depicted and analyzed from the FL1-H  
 10 and FL2-H of each histogram. The changes of fluorescence depicted from DCF (oxidized form of

1 DCFDA) and Et (oxidized form of DHE), respectively, were statistically significant between the  
2 treated-groups and the non-treated control. \*  $p < 0.05$ , \*\*  $p < 0.01$ , ns, not significant.

3

4

1 **Supplementary Table S1. Combination index (CI) and Dose reduction index (DRI) for drug**  
 2 **combination by NAC and AAP.**

|                                    |              | NAC                |     | AAP                |     |     |     |
|------------------------------------|--------------|--------------------|-----|--------------------|-----|-----|-----|
|                                    |              | Concentration (mM) |     | Concentration (mM) |     |     |     |
| Percentage of protection           |              | Alone              | Mix | Alone              | Mix |     |     |
| Drug combinations IC <sub>25</sub> | CI           | DRI                |     | DRI                |     |     |     |
| Group 1                            | <b>0.893</b> | 7                  | 1   | 7.0                | 0.8 | 0.6 | 1.3 |
| Group 2                            | <b>0.911</b> | 7                  | 2   | 3.5                | 0.8 | 0.5 | 1.6 |
| Group 3                            | <b>0.679</b> | 7                  | 3   | 2.3                | 0.8 | 0.2 | 4.0 |
| Group 4                            | <b>0.804</b> | 7                  | 3   | 2.3                | 0.8 | 0.3 | 2.7 |
| Group 5                            | <b>0.786</b> | 7                  | 2   | 3.5                | 0.8 | 0.4 | 2.0 |
| Group 6                            | <b>0.929</b> | 7                  | 3   | 2.3                | 0.8 | 0.4 | 2.0 |
| Group 7                            | <b>1.196</b> | 7                  | 4   | 1.8                | 0.8 | 0.5 | 1.6 |

3 CI and DRI represent the fold of dose reduction that is allowed in combination for a given degree of  
 4 effects as compared with the dose of each drug alone.

5
